# Supplementary material for: Discovery and Validation of Serum Metabolic Signature of Neonatal Sepsis
Source: Research Square preprint supplement (doi:10.21203/rs.3.rs-4770735/v1), 2024-07-26
Supplement: Supplementary file 1 [file 67ddc82fb7dd98339628a617.xlsx]

## Sheet: S2
S2: Clinical details of of the recruited neonates from the sepsis and control groups
Cohort	Status	Subject ID	Gender*	Weight in kg	Mode of delivery#	Gestation in weeks	Apgar 1 min	Apgar 5 min	Difficulty breathing (Y/N/NA)	Apnea (Y/N/NA)	Difficulty feeding (Y/N/NA)	Convulsions (Y/N/NA)	Respiratory rate > 60/min (Y/N/NA)	Other complicationsa	White blood cells (WBC) count (absolute numbers/ microlitre)	Absolute neutrophil count	C-reactive protein (CRP) absolute value in mg/L	Causative organismb	Outcomec	Cause of death	Antibiotics received (Y/N/NA)	Antibiotic Name	Duration of antibiotics received (days)
Discovery set-I	Culture Negative	A1	F	1.81	C	34	7	8	Y	N	N	N	N	LPV 3 DAYS	72000	1950			Discharged		Y	Netilmicin, Vancomycin	7
		A2	F	1.54	V	33	7	8	Y	Y	N	N	Y	MILD RETRACTION (ICR)	9200	5630			Discharged		Y	Amikacin, Cloxacillin	13
		A3	M	1.95	V	34	7	8	Y	N	N	N	N		6200	1590			Discharged		Y	Amikacin, Cloxacillin	5
		A4	F	1.06	V	28	4	7	N	N	N	N	Y	LPV MORE THAN 6 DAYS	69000	3950	6		Admitted		Y	Amikacin, Cloxacillin	7
		A5	M	1.28	C	28	6	8	Y	N	N	N	N	LPV x 5 DAYS	14200	8200			Admitted		Y	Amikacin, Cloxacillin, Vancomycin, Netilmicin, Meropenem	3, 3, 2, 2, 11
		A6	M	1.04	V	32	6	7	Y	Y	N	N	N		7700	6600			Discharged		Y	Amikacin, Cloxacillin	6
		A7	M	1.25	V	29	7	8	Y	N	N	N	N	LPV 80HRS	51000	1300			Discharged		Y	Amikacin, Cloxacillin, Ampicillin	8
		A8	M	1.3	V	29	7	8	Y	N	N	N	N	LPV 80HRS	11000	130			Discharged		Y	Amikacin, Cloxacillin, Netilmicin, Vancomycin	7
		A9	F	2.035	C	34	4	6	Y	N	N	N	N	Birth asphyxia	27800	1466			Discharged		Y	Amikacin, Cloxacillin	8
		A10	F	1.3	V	29	6	8	Y	N	N	N	N		24100	1571			Discharged		Y	Amikacin	5
		A11	M	1.1	V	33	7	8	N	Y	N	N	N		25600	7500	6		Admitted		Y	Amikacin, Cloxacillin, Meropenem, Vancomycin	2, 2, 21, 21, 21
		A12	M	1.1	V	29	7	8	NA	NA	NA	NA	NA						Discharged		NA
		A13	M	1.8	V	29	8	9	N	Y	N	N	N		6000	1080			Discharged		Y	Amikacin, Cloxacillin	9
		A14	F	1.9	C	30	5	7	Y	Y	N	N	N		62000	3620			Expired	Birth Asphyxia	Y	Amikacin, Cloxacillin	4
		A15	M	1.52	V	32	8	9	N	N	N	N	N	LPV since 19 days	12200	3400			Discharged		Y	Amikacin, Cloxacillin	4
		A16	M	0.92	V	28	3	7	Y	N	N	N	N	LPV 13 HRS	53300	1045			Expired		Y	Amikacin, Cloxacillin	3
		A17	M	0.91	V	28	8	9	N	Y	N	N	Y	LPV 25 HOURS	7300	2560			Expired		Y	Amikacin, Cloxacillin	3
		A18	M	0.96	V	30	6	8	N	N	N	N	N	LPV 2 DAYS	13200	5680			Expired		Y	Meropenem, Vancomycin	4
		A19	F	1.222	V	30	6	7	Y	N	N	N	Y	LPV since 5 days	10400	3280			Discharged		N
		A20	F	1.53	V	32	7	8	NA	NA	NA	NA	NA						Discharged		NA
		A21	M	1.685	C	30	8	9	Y	N	N	N	N		13200	4380			Discharged		Y	Amikacin, Cloxacillin	7
		A22	F	1.68	V	32	8	9	N	N	N	N	N	LPV 3 DAYS	13500	4000			Discharged		Y	Amikacin, Cloxacillin	5
		A23	M	1.57	V	33	7	8	Y	N	N	N	N	Aspiration pneumonia	21100	9210			Discharged		Y
		A24	F	1.57	V	33	8	9	Y	N	N	N	N	PROM WITH LPV	8300	3300			Discharged		Y	Amikacin, Cloxacillin	7
	Culture Positive	B1	F	0.97	V	30	8	9	Y	N	Y	N	N		7500	1690		SE	Admitted		Y	Netilmicin, Vancomycin, Amikacin, Cloxacillin	3, 15, 3, 3
		B2	F	1.12	V	31	6	7	N	N	Y	Y	N		41000	6000		AB	Admitted		Y	Fluconazole, Meropenem, Vancomycin, Amikacin, Cloxacillin	24
		B3	F	1.05	V	31	7	8	N	N	N	N	N		12006	5607	6	EF	Discharged		Y	Vancomycin	21
		B4	F	1	V	31	7	8	N	N	N	N	N	lpv 2 months	17500	1088		SAG	Admitted		Y	Amikacin, Cloxacillin	13
		B5	M	1.5	V	30	2	3	Y	N	N	N	N		11100	2290		SA	Expired		Y	Amikacin, Cloxacillin	2
		B6	F	1.8	V	33	0	3	Y	N	N	N	N	BIRTH ASPHYXIA	14300	8000		CNS	Expired		Y	Amikacin, Cloxacillin	2
		B7	M	1.6	V	30	5	8	Y	Y	N	N	N		18200	3100	6	SH	Admitted		Y	Amikacin, Cloxacillin, Meropenem, Netilmicin, Gentamycin	28
		B8	M	0.95	C	33	6	5	N	N	N	N	N		15400	8310		CNS	Expired	Birth Asphyxia	Y	Amikacin, Cloxacillin	3
		B9	M	1.55	C	31	8	9	N	Y	N	N	N		11500	1010		AB	Expired		Y	Ampicillin, Cloxacillin	2
		B10	M	2.3	V	34	8	9	N	N	N	N	N	LPV since 28 hours	7200	2350		CNS	Discharged		Y	Amikacin, Cloxacillin	7
		B11	F	1.26	V	30	6	7	N	N	N	N	N	LPV 49 HRS	12200	4530		SAG	Discharged		Y	Meropenem, Vancomycin	27
		B12	M	0.95	C	31	7	8	N	Y	Y	N	N		81000	1270		AB	Admitted	Prematurity	Y	Amikacin, Cloxacillin	24, 3, 21
		B13	M	1.36	C	29	7	8	N	N	N	N	N	LPV 20 DAYS	9600	1890		SE	Discharged		Y	Amikacin, Cloxacillin	17
		B14	M	1.3	C	30	3	3	Y	N	N	N	N		12600	2840		AB	Expired		N
		B15	M	2.06	V	33	8	9	Y	Y	N	N	N	LPV x MORE THAN 18 HRS	24000	7500		AB			Y	Amikacin, Cloxacillin, Meropenem, Vancomycin	2, 2, 4, 2
		B16	F	0.75	V	29	3	3	Y	N	Y	N	N		5400	3580		AB	Expired	Prematurity	Y	Amikacin, Cloxacillin	4
	Healthy Control	C1	M	1.2	V	31	4	6	N	N	N	N	N	LPV 10 DAYS	10000	6000	6		Discharged		N
		C2	M	2.46	V	33	8	9	NA	NA	NA	NA	NA						Discharged		NA
		C3	F	2.021	V	29	8	9	NA	NA	NA	NA	NA						Discharged		NA
		C4	M	2.025	C	34	7	9	NA	NA	NA	NA	NA						Discharged		NA
		C5	F	1.89	V	32	7	8	NA	NA	NA	NA	NA						Discharged		NA
		C6	M	1.8	C	34	7	8	NA	NA	NA	NA	NA						Discharged		NA
		C7	F	2.1	C	32	7	9	NA	NA	NA	NA	NA						Discharged		NA
		C8	F	2.39	C	34	5	9	NA	NA	NA	NA	NA						Discharged		NA
		C9	M	1.25	C	33	5	7	NA	NA	NA	NA	NA						Discharged		NA
		C10	F	2.33	V	33	7	9	NA	NA	NA	NA	NA						Discharged		NA
		C11	F	2	V	34	8	9	NA	NA	NA	NA	NA						Discharged		NA
		C12	M	2.76	V	34	8	9	NA	NA	NA	NA	NA						Discharged		NA
		C13	M	1.8	V	33	8	9	NA	NA	NA	NA	NA						Discharged		NA
		C14	M	2.35	C	34	6	7	NA	NA	NA	NA	NA						Discharged		NA
	No Sepsis	D1	M	1.56	V	32	6	8	N	N	N	N	Y	LPV IN NO THIS FOR MORE THAN 3 DAYS	13500	4290			Discharged		N
		D2	M	1.98	V	33	8	9	Y	N	N	N	N		17300	11550			Discharged		Y	Ampicillin, Cloxacillin	1, 1
		D3	M	1.45	V	33	7	8	NA	NA	NA	NA	NA						Discharged		NA
		D4	M	1.61	V	31	7	8	N	N	N	N	N	LPV 10 -12 DAYS	57000	840			LAMA		N
		D5	F	1.71	C	32	8	9	N	N	N	N	N	LPV 3 days	31600				Discharged		N
		D6	M	1.6	C	32	7	8	Y	N	N	N	Y	HR-136 MIN/SP02-78%	32900	8560			Discharged		N
		D7	F	1.4	V	32	7	8	NA	NA	NA	NA	NA						Discharged		NA
		D8	M	1.25	C	31	7	9	NA	NA	NA	NA	NA						Discharged		NA
		D9	M	0.9	C	31	3	5	NA	NA	NA	NA	NA						Expired		NA
		D10	M	1.1	V	29	7	8	NA	NA	NA	NA	NA						Expired		NA
		D11	F	1.7	V	32	6	0	N	N	N	N	N	LPV 2 MONTH					Discharged		N
		D12	F	1.6	V	31	8	9	N	N	N	N	N						Discharged		N
		D13	F	1.1	V	30	8	9	N	N	N	N	N	LPV since 18 days	25800	9150			Discharged		N
		D14	M	1.2	C	28	7	8	N	Y	N	N	N		7700	3430			Admitted		N
		D15	M	2	V	34	8	9	Y	N	N	N	N		15700	8690			Discharged		N
		D16	F	1.5	V	34	5	8	Y	N	N	N	Y		15000	8530			Discharged		N
		D17	M	2.07	C	33	8	9	N	N	N	N	N	LPV 5 DAYS					Discharged		Y	Amikacin, Cloxacillin	4
Discovery set-II	Culture Negative	E1	M	1.4	V	30	7	8	Y	N	N	N	Y		80000	2510			Expired	Prematurity	Y	Amikacin, Cloxacillin, Vancomycin, Netilmicin	2, 2, 2, 2
		E2	M	0.8	V	31	1	4	Y	N	N	N	N	SHOCK	8000	3390			Expired	Birth Asphyxia	Y	Amikacin, Cloxacillin	1, 1
		E3	M	0.7	V	28	8	9	N	N	N	N	Y	lpv 25 hours	45000	1320	6		Admitted		Y
		E4	M	1.2	V	30	5	6	Y	N	N	N	N	shock	4400	1440			Expired	Birth Asphyxia	Y	Vancomycin, Netilmicin	4, 4
		E5	M	2	V	33	7	8	N	N	N	N	N		9500	2840			Discharged		Y	Amikacin, Cloxacillin	4, 4
		E6	M	2	V	33	8	9	N	N	N	N	N	LPV 4 DAYS					Discharged		N
		E7	M	1.1	V	29	4	2	Y	N	N	Y	N	LPV 2 DAYS	7500	3740			Expired	Others	Y
		E8	M	1.5	V	29	8	9	Y	N	N	N	N		8000	2500			Discharged		Y	Amikacin, Cloxacillin	4, 4
		E9	M	2.4	V	32	5	6	Y	N	N	N	N	seizure	79000	4460			LAMA		Y	Amikacin,Cloxacillin	5, 5
		E10	M	1.3	V	31	7	8	N	N	N	N	N	LPV 3 HRS	21000	370			Expired	Infection	Y	Amikacin, Cloxacillin	6, 6
		E11	M	1.8	V	33	2	3	NA	NA	NA	NA	NA						Discharged		NA
		E12	M	1.2	V	29	8	9	N	N	N	N	N	BPV 58 HRS	11100	4750			Expired	Prematurity	Y	Amikacin, Cloxacillin, Netilmicin, Vancomycin	1, 1, 1, 1
		E13	M	1.8	V	32	8	9	N	N	N	N	N	impending eclampsia	64000	3220			Discharged		Y	Amikacin, Cloxacillin	11, 11
		E14	M	2.2	V	34	7	8	N	N	N	N	N	FETAL ANEMIA, CARDIMEGALY	18900	5300			Discharged		Y	Amikacin,Cloxacillin	14, 14
		E15	M	0.8	V	31	5	7	N	N	N	N	N	BPV x 10 DAYS EXTREMELY PRETERM BABY	9400	3840			Admitted		Y	Amikacin, Cloxacillin, Meropenem, Vancomycin, Fluconazole	4, 4, 9, 13, 6
		E16	M	1.4	V	31	6	8	Y	N	N	N	N	LPV x 18 HRS	6500	3000			Discharged		Y	Vancomycin, Netilmicin	6, 6
		E17	M	2	V	34	5	7	N	Y	N	Y	N	LPV 72 HRS	19200	7150			Discharged		Y	Amikacin, Cloxacillin	10, 10
		E18	M	1	V	34	7	8	Y	N	N	N	N	LPV 14 DAYS	10300	4370				Infection	Y	Amikacin, Cloxacillin	1, 1
		E19	M	1.3	V	30	6	7	Y	N	Y	N	N		19200	2830			Expired	Infection	Y	Amikacin, Cloxacillin, Vancomycin, Netilmicin	6, 6, 2, 2
		E20	M	2.2	V	32	5	8	Y	N	N	N	N	congenital pneumonia shock during tachypnea	7500	2820			Discharged		Y	Amikacin, Cloxacillin	7, 7
		E21	M	2	V	34	2	3	Y	N	N	N	N	fetal distress prenatal asphyxia shock	15700	8830			Discharged	Birth Asphyxia	Y	Amikacin, Cloxacillin, Vancomycin, Netilmicin	5, 5, 1, 1
		E22	M	1	V	28	8	9	Y	Y	N	N	N	MOTHER HAD LPV HISTORY 72 HRS SHOCK	9000	2840			Expired	Infection	Y	Amikacin, Cloxacillin, Vancomycin, Meropenem, Others	2, 2, 13, 2, 12
		E23	M	1.5	V	31	7	8	Y	N	N	N	N	LPV 34 HRS SHOCK	8700	2630			Expired	Infection	Y	Amikacin, Cloxacillin	8, 8
		E24	M	2.5	V	32	8	9	Y	N	N	N	Y	LPV 24 HRS congenital phenomena	22500	14570			Expired		Y	Amikacin, Cloxacillin	6, 6
		E25	M	1.4	V	28	8	9	N	N	N	N	N	LPV 168 HRS SHOCK SEIZURE	43900	19490			Discharged	Infection	Y	Amikacin, Cloxacillin, Vancomycin, Ciprofloxacin/norflox	1, 1,2, 2
		E26	M	1.9	V	34	8	9	Y	N	Y	N	Y	LPV 8 DAYS LBW	7800	760			Expired	Infection	Y	Amikacin, Cloxacillin, Vancomycin, Others	5, 5, 1, 1
		E27	M	1.6	V	30	8	9	Y	N	Y	N	Y	RD TACHYOREA	5300	1650			Expired	Infection	Y	Amikacin, Cloxacillin, Netilmicin, Others	1, 1, 4, 4
		E28	M	1.6	V	34	8	9	NA	NA	NA	NA	NA						Expired		NA
		E29	M	1.9	V	32	7	8	NA	NA	NA	NA	NA								NA
		E30	M	1.2	V	30	6	8	NA	NA	NA	NA	NA								NA
		E31	M	0.9	V	33	8	9	NA	NA	NA	NA	NA								NA
		E32	M	0.7	V	29	5	8	NA	N	NA	NA	NA	FLUID RESPONSIVE SHOCK	9460	1660	8			Others	Y
		E33	M	3	V	33	4	5	NA	N	NA	NA	NA	fetal ascites and hydrops fetalis	10270	6840	4		Expired		Y
		E34	F	1.2	V	29	6	8	NA	NA	NA	NA	NA						Referred		NA
		E35	F	1.5	V	34	5	8	N	N	N	N	N	SHOCK	10870	5660	1		Admitted		Y	Amikacin, Piperacillin +tazobactam	9, 9
		E36	F	1	V	31	5	7	N	N	N	N	N	perinatal asphyxia maternal TLC INCREASE LPV/MORE THAN 24 HOURS	5700	2550	1		Discharged		Y
		E37	F	1.4	V	32	4	6	Y	N	N	N	N		6100		9		Admitted		Y	Amikacin, Piperacillin +tazobactam	5, 5
		E38	F	1.6	V	33	9	10	N	N	Y	N	N		3310	1300	4		Admitted		Y
		E39	F	1.5	C	29	8	8	Y	N	N	N	N		3000		28			Infection	Y	Gentamycin, Meropenem, Voraconazole	1, 3, 3
		E40	F	1	C	28	2	5	Y	N	N	N	N		9600		10		Expired	Birth Asphyxia	Y	7, Vancomycin	1, 1
		E41	F	2	C	34	6	8	Y	N	N	N	N		16900		25		Expired	Others	Y	Meropenem, Vancomycin	9, 9
		E42	F	1.2	C	29	7	7	Y	N	N	N	N		10200		4		Expired	Infection	Y	Ceftriaxone, Gentamycin, Vancomycin, Meropenem	1, 1, 1, 1
		E43	F	1.2	C	28	8	9	Y	N	N	N	N	History of LPV 5 days	75000		25		Expired	Others	Y	Ceftriaxone, Gentamycin, Meropenem, Vancomycin	1, 1, 2, 2
		E44	F	1.5	C	28	6	6	Y	N	N	N	N		9500		2		Expired	Others	Y	Meropenem, Vancomycin	1, 1
		E45	F	1.2	C	29	9	9	Y	N	N	N	N		14400		15		Expired	Others	Y	Ceftriaxone, Gentamycin, Meropenem, Vancomycin	1, 1, 1, 1
		E46	F	1.5	C	30	9	9	Y	N	N	N	N	24 hrs of LPV history in Mother	8700		48		Expired		Y	Meropenem, Gentamycin, Vancomycin, Colistin, Metronidazole	4, 4, 1, 1, 1, 1
		E47	F	1.5	C	30	9	9	Y	N	N	N	N	24 hrs of LPV history in Mother	6200		77		Expired	Others	Y	Gentamycin, Meropenem, Ceftriaxone	2, 2, 1
		E48	F	1	C	34	9	9	Y	N	N	N	N		13600				Referred	Others	Y	Ceftriaxone, Gentamycin, Meropenem, Vancomycin	2, 2, 1, m1
		E49	F	1.5	C	31	5	8	Y	N	N	N	N		5500				Expired	Infection	Y	Meropenem, Gentamycin, Metronidazole, Vancomycin	2, 1, 1, 2
		E50	F	1.2	C	33	8	8	Y	N	N	N	N		10600				Expired	Infection	Y	Ceftriaxone, Gentamycin, Meropenem, Vancomycin, Colistin	1, 1, 3, 5, 3
		E51	F	1.8	C	30	7	8	Y	N	N	N	N	LPV since 6 days	21600				Expired		Y	Ceftriaxone, Gentamycin, Meropenem, Vancomycin	3, 3, 10, 10
		E52	F	1.2	C	28	6	9	Y	N	N	N	N		14000		65		Expired	Infection	Y	Ceftriaxone, Gentamycin	4, 4
		E53	F	1.2	C	29	4	6	Y	N	N	N	N		4200		75		Discharged	Infection	Y	Gentamycin, Ceftriaxone, Meropenem, Vancomycin	2, 2, 3, 3
		E54	F	1.7	C	29	9	9	N	N	N	N	N	Mother history of LPV 2 days	19600		81		Expired	Prematurity	Y	Ceftriaxone, Gentamycin	2, 2
		E55	F	1.5	C	32	8	8	Y	N	N	N	N	History of LPV since 5 days in Mother	14100		2		Expired	Infection	Y	Gentamycin, Ceftriaxone	1, 1
		E56	F	2.3	C	31	9	9	Y	N	N	N	N	Pneumonia TTNB	11300		74		Expired		Y	Ceftriaxone, Gentamycin	13, 13
		E57	F	1.5	C	34	8	9	Y	N	N	N	N						Expired	Infection	Y	Meropenem, Vancomycin	1, 1
		E58	F	1	C	29	7	9	N	N	N	N	N		31600		134		Expired	Infection	Y	Ceftriaxone, Gentamycin, Vancomycin	1, 1, 1
		E59	F	1.5	C	34	9	10	Y	N	N	N	N		7300		123		Discharged	Infection	Y	Ceftriaxone, Gentamycin	2, 2
		E60	F	1.2	C	28	7	9	Y	N	N	N	N	Mat history of LPV since 36hrs					Expired	Prematurity	Y	Ceftriaxone, Gentamycin	1, 1
		E61	F	1.5	C	29	8	8	Y	N	N	N	N		10600		122		Expired	Prematurity	Y	Meropenem, Vancomycin, Ceftriaxone, Gentamycin	8, 8, 1, 1
		E62	F	0.8	C	28	8	8	Y	N	N	N	N	Mat history of BPV since 42hrs	38400		4		Expired	Infection	Y	Ceftriaxone, Gentamycin	2, 2
		E63	F	1.5	C	31	3	6	Y	N	N	N	N	Mat history of LPV since 13hrs					Expired	Others	Y	Ceftriaxone, Gentamycin, Meropenem	2, 2, 1
		E64	F	1.5	C	32	6	7	Y	N	N	N	N	Maternal history of LPV since 18hrs	16300	3780	5		Expired	Infection	Y	Ceftriaxone, Gentamycin, Meropenem	1, 1, 1
		E65	F	1.1	C	32	5	9	Y	N	N	N	N	Maternal history of LPV since 14hrs	11300		47		Expired	Infection	Y	Ceftriaxone, Gentamycin	1, 1
		E66	M	1.5	V	31	9	NA	Y	N	Y	N	N		11100		15		Expired	Infection	Y	Gentamycin, Meropenem, Vancomycin	1, 2, 1
		E67	M	1.2	NA	30	8	9	Y	N	N	N	N	LUP 1 HRS PREMATURITY	6800	4090			Expired		Y	Amikacin, Cloxacillin	6, 6
		E68	F	1.2	NA	32	9	7	Y	N	N	N	N	Mat History of LPV since 24hrs	10000		12		Expired	Infection	Y	Ceftriaxone, Gentamycin	1, 1
		E69	F	1.8	C	32	8	10	Y	N	N	N	N	LPV history in Mother	4400		49		Expired	Infection	Y	Meropenem, Vancomycin	2,2
	Culture Positive	F1	M	1.4	V	28	4	6	Y	N	N	N	N	LPV 16 DAYS	15000	9000		SE	Expired	Birth Asphyxia	Y	Amikacin, Cloxacillin	1, 1
		F2	M	1.2	V	28	7	8	Y	Y	N	N	N		3900	200		SH	Expired	Congenital Malformations	Y	Amikacin, Cloxacillin, Vancomycin,Meropenem	2, 2, 2,2
		F3	M	1.3	V	32	7	5	Y	N	N	N	Y		6900	5550		SE	Discharged		Y	Amikacin, Cloxacillin	4, 4
		F4	M	1.1	V	29	6	9	Y	Y	N	N	Y	RD	4500	2710		KP	Expired	Infection	Y	Amikacin	1
		F5	M	1.6	V	31	8	9	N	Y	N	N	N	SHOCK BPU 10 HRS	5700	2730		AB	Expired	Infection	Y	Amikacin, Cloxacillin	10, 10
		F6	M	1.5	V	30	6	7	N	N	N	N	N	LPV LBW	8300	2390		EC, AB	Expired	Infection	Y	Amikacin, Cloxacillin	9, 9
		F7	F	1.6	V	29	7	8	Y	N	N	N	N	eye yellow discharge acute gastroenteritis in mother	20000	8140		Candida SP	LAMA		Y	Amikacin, Cloxacillin, Vancomycin, Meropenem, Netilmicin, Amphotericin	1, 1, 19, 10, 9, 5
		F8	M	2.1	V	31	7	8	N	Y	N	N	N	SHOCK BPU 20 HRS RFS	8100	3950		EF	Expired	Infection	Y	Amikacin, Cloxacillin, Netilmicin, Vancomycin	1, 1,3, 3
		F9	M	0.9	V	34	6	8	N	N	Y	N	Y	baby aspirate early onset thrombocytopenia	8000	2520		CONTAMINANTED	Expired	Infection	Y	Voraconazole, Ciprofloxacin/norflox, Amikacin, Cloxacillin	2, 2, 5, 5
		F10	M	1.3	V	30	6	8	Y	N	N	N	N	RD VERY PREMATURITY MOD	10700	6750		MIXCONS, SH	Expired	Infection	Y	Amikacin, Cloxacillin, Vancomycin, Others	3, 3, 2, 2
		F11	M	1.2	V	33	3	6	N	N	N	N	N	LPV 20DAYS BPU 2 DAYS SHOCK UTI	11300	5060		MIXCONS	Expired	Infection	Y	Amikacin, Cloxacillin	9, 9
		F12	M	1.6	V	32	8	9	Y	N	N	N	N		5000	1920		MIXCONS, KP	Discharged		Y	Amikacin, Cloxacillin	26, 26
		F13	F	1	V	28	7	9	Y	Y	Y	N	N	SHOCK	3900	600		MIXCONS	Expired	Infection	Y	Vancomycin, Ciprofloxacin/norflox	3, 3
		F14	M	2.7	V	34	5	8	NA	NA	NA	NA	NA					SE			NA
		F15	M	1.8	V	30	2	6	NA	NA	NA	NA	NA					MIXCONS, AB			NA
		F16	F	0.6	V	31	6	8	NA	NA	NA	NA	NA					MIXCONS			NA
		F17	M	1.1	V	32	6	7	NA	NA	NA	NA	NA					MIX CONS			NA
		F18	F	0.8	V	28	6	7	NA	NA	NA	NA	NA					EC			NA
		F19	F	1.6	V	31	6	8	N	N	N	N	N	BPV 3 DAYS	25600	12960		diphtherias, MIXCONS	Discharged	Others	Y	Amikacin, Cloxacillin	15, 15
		F20	M	1.6	V	31	6	8	NA	NA	NA	NA	NA					Contaminated			NA
		F21	M	1	V	29	7	8	NA	NA	NA	NA	NA					EF			NA
		F22	M	1.4	V	32	6	8	NA	NA	NA	NA	NA					AB			NA
		F23	M	1.3	V	30	8	9	NA	NA	NA	NA	NA					KP			NA
		F24	F	1.3	V	31	8	9	NA	NA	NA	NA	NA					KP, AB			NA
		F25	M	1.6	V	31	7	8	Y	N	N	N	N	Septic shock	1200		11	AB	LAMA		Y	Amikacin, Piperacillin +tazobactam	5, 3
		F26	M	1.6	V	32	6	7	Y	N	Y	N	N		11700	3200		SH	Expired	Infection	Y	Ampicillin, Gentamycin, Amikacin, Piperacillin +tazobactam	1, 1, 1, 2
		F27	M	1.7	V	32	7	8	N	N	Y	N	Y	LPV 2 DAYS	61000	2950	6	E COLI	Discharged		Y	Netilmicin, Vancomycin	27, 27
		F28	F	1.2	V	28	7	7	Y	N	N	N	N		8600	6000		SA	Expired	Infection	Y	Ampicillin, Gentamycin, Piperacillin +tazobactam, Vancomycin	2, 5, 2,2
		F29	M	1.5	V	32	7	8	N	N	N	N	N	Swelling over right knee	23000	8200		SA	LAMA		Y	Amikacin, Piperacillin +tazobactam, Vancomycin	2, 2, 1
		F30	M	1.8	V	33	7	8	N	N	N	N	N	Leukopenia	17100	4700	6	EF	Discharged		Y	Amikacin, Piperacillin +tazobactam, Vancomycin	6, 10, 14
		F31	M	1.5	V	31	8	9	Y	N	N	N	N		600		22	EF	Expired	Infection	Y	Gentamycin, Meropenem, Ceftazidime, Colistin, Vancomycin, Linezolid,Others	2, 6, 1, 9, 1, 7, 7
		F32	M	1.8	V	34	8	8	Y	N	N	N	N		6100		32	AB, CT	Discharged		Y	Ceftriaxone, Gentamycin, Meropenem, Vancomycin	3, 3, 9, 9
		F33	M	1.6	V	32	9	9	Y	N	N	N	N	LPV since 5 days	20100		23	EF	Expired	Infection	Y	Meropenem, Gentamycin, Vancomycin, Ceftriaxone	1, 1, 1, 1
		F34	M	1.1	V	32	9	9	Y	N	N	N	N	13 hr LPV history in Mother	5600	6470	25	PA	Expired	Infection	Y	Meropenem, Vancomycin	1, 1
		F35	F	1.5	V	31	8	8	N	N	Y	N	N		9200		23	Mixed , SE	Expired	Infection	Y	Ceftriaxone, Gentamycin, Meropenem, Vancomycin	1, 1, 1, 1
		F36	M	1.4	V	33	6	6	Y	N	N	N	N	History of LPV in Mother since 4 days before delivery	5500		43	PA, Mixed	Expired	Infection	Y	Meropenem, Vancomycin, Ceftriaxone, Gentamycin, Colistin	6, 12, 1, 1, 5
		F37	M	1	V	34	8	8	Y	N	N	N	N		2900		42	AB	Expired	Prematurity	Y	Gentamycin, Meropenem	5, 5
		F38	M	1.2	V	30	6	9	Y	N	N	N	N		9300		34	KP	Expired	Infection	Y	Ceftriaxone, Gentamycin, Vancomycin, Meropenem, Colistin	3, 3, 5, 1, 4
		F39	F	1	V	28	6	8	Y	N	N	N	N		7000		16	KP	Expired	Prematurity	Y	Ceftriaxone, Gentamycin, Meropenem	1, 5, 5
		F40	F	1.5	V	32	7	8	Y	N	N	N	N		12900		6	SH, AB	Expired	Infection	Y	Vancomycin, Meropenem, Ceftriaxone, Gentamycin, Colistin	9, 6, 2, 2, 4
		F41	M	1.6	V	30	8	8	Y	N	N	N	N		14600			AB	Expired	Infection	Y	Ceftriaxone, Gentamycin, Vancomycin, Meropenem, Colistin, Linezolid	1, 1, 4, 5, 3, 3
		F42	F	1.3	V	31	9	9	Y	N	N	N	N	11 hour of LPV history in Mother	4600			AB	Expired	Infection	Y	Meropenem, Vancomycin	2, 2
		F43	M	1.5	V	29	6	9	Y	N	N	N	N	4 to 5 days of LPV history of Mother	7700			SHo, AB	Expired	Infection	Y	Ceftriaxone, Gentamycin, Meropenem, Vancomycin	2, 2, 3, 3
		F44	F	1.3	C	28	7	10	Y	N	N	N	N		2500		47	AC	Expired	Infection	Y	Ceftriaxone, Gentamycin, Meropenem, Vancomycin	1, 1, 1, 1
		F45	M	1.4	C	33	7	9	Y	N	N	N	N	Mat history of BPV from 12 PM (21 Jun 2023)	3300		20	KP	Expired	Infection	NA	Meropenem, Vancomycin	2, 2
		F46	F	0.9	C	29	7	8	Y	N	N	N	Y	Mat history of LPV since 17-June-2023 (3days)	13900		37	KP	Expired	Prematurity	Y	Ceftriaxone, Gentamycin	2, 2
		F47	M	1.2	C	28	8	9	Y	N	N	N	N		10400		45	KP	Expired	Prematurity	Y	Ceftriaxone, Gentamycin	3, 3
		F48	M	1.5	C	31	10	10	Y	N	N	N	N	LPV 2 days history in Mother	9400		125	KP	Expired	Infection	Y	Ceftriaxone, Gentamycin, Vancomycin, Meropenem	1, 1, 3, 3
		F49	F	1.6	C	33	9	9	Y	N	N	N	N					SH, KP	LAMA		Y	Gentamycin, Ceftriaxone	1, 1
		F50	F	1.7	C	32	4	7	Y	N	N	N	N		7400		87	KP	Expired	Infection	Y	Ceftriaxone, Gentamycin, Vancomycin	2, 1, 1
		F51	M	2.3	C	31	4	8	Y	N	N	N	N	Maternal history of LPV since 24 hrs	26500		101	AB	Expired	Infection	Y	Ceftriaxone, Gentamycin, Meropenem, Vancomycin	2, 2, 6, 6
		F52	M	1.2	C	29	7	8	Y	N	N	N	N	LPV since 36 hours	28000		20	KP	Expired	Infection	Y	Ceftriaxone, Gentamycin, Meropenem,Vancomycin	1, 1, 1, 1
		F53	F	1.8	C	33	9	10	Y	N	N	N	N		4300		72	KP	Expired	Infection	Y	Meropenem, Vancomycin, Colistin	2, 3, 1
		F54	M	1.4	C	32	9	9	Y	N	N	N	N		5500			KP	Expired	Infection	Y	Meropenem, Vancomycin, Colistin	1, 2, 1
		F55	F	1.2	C	30	8	8	Y	N	N	N	N	Maternal history of LPV since 6 days	8200		20	KP	Expired	Prematurity	N
		F56	F	1.6	C	34	9	9	Y	Y	N	N	N		21200			KP	Expired	Infection	Y	Ceftriaxone, Gentamycin	3, 3
		F57	M	1	C	33	9	9	Y	N	N	N	N		2700			KP	Expired	Infection	Y	Meropenem, Vancomycin	2, 2
		F58	M	1.7	C	34	8	8	Y	N	N	N	N	Maternal history of LPV of 32 hrs	26600			KP, ASB	Expired	Infection	Y	Meropenem, Vancomycin, Ceftriaxone, Gentamycin	2, 2, 1, 1
		F59	F	1.2	C	32	9	9	Y	N	N	N	N		10400			KP	Expired	Infection	Y	Meropenem, Gentamycin	3, 3
		F60	M	1.9	C	32	9	9	Y	N	N	N	N		9000		66	AB	Expired	Infection	Y	Gentamycin, Ceftriaxone, Meropenem, Colistin	3, 2, 5, 4
		F61	M	1.5	C	30	8	9	Y	Y	N	N	N	3 days of LPV history in Mother	1800	1550	34	SH	Expired	Infection	Y	Ceftriaxone, Gentamycin, Meropenem	1, 2, 2
		F62	M	1.3	C	32	9	9	Y	N	N	N	Y		17000		54	SA	LAMA		Y	Ceftriaxone, Gentamycin	4, 4
		F63	F	1.4	C	31	7	7	Y	N	N	N	N	Mat history of LPV since 6 days	12900	8470	19	EC	Discharged		Y	Meropenem, Ceftriaxone, Gentamycin, Piperacillin +tazobactam	14, 5, 4, 3
	Healthy Control	G1	F	1.3	C	30	8	9	NA	NA	NA	NA	NA					Candida			NA
		G2	F	1.8	C	34	7	8	NA	NA	NA	NA	NA								NA
		G3	F	1.5	V	31	8	10	NA	NA	NA	NA	NA								NA
		G4	M	1.3	V	29	7	8	NA	NA	NA	NA	NA						Discharged		NA
		G5	M	1.6	V	34	7	8	NA	NA	NA	NA	NA						Discharged		NA
		G6	M	2	V	34	7	8	NA	NA	NA	NA	NA						Discharged		NA
		G7	M	2	V	34	7	8	NA	NA	NA	NA	NA						Discharged		NA
		G8	F	1.5	V	34	5	7	NA	NA	NA	NA	NA						Discharged		NA
		G9	F	1.4	V	30	3	6	NA	NA	NA	NA	NA						Discharged		NA
		G10	M	1.7	V	32	7	8	NA	NA	NA	NA	NA						Discharged		NA
		G11	M	1.8	V	33	6	7	NA	NA	NA	NA	NA						Discharged		NA
		G12	F	1.4	V	30	7	8	NA	NA	NA	NA	NA						LAMA		NA
		G13	F	1.5	V	31	7	8	NA	NA	NA	NA	NA						Discharged		NA
		G14	M	2.3	V	33	7	8	NA	NA	NA	NA	NA						Discharged		NA
		G15	M	2.2	V	33	6	7	NA	NA	NA	NA	NA						Discharged		NA
		G16	M	1.6	V	32	6	7	NA	NA	NA	NA	NA						Discharged		NA
		G17	M	1.7	V	33	7	8	NA	NA	NA	NA	NA						Discharged		NA
		G18	F	1.7	V	34	7	8	NA	NA	NA	NA	NA						Discharged		NA
		G19	F	1.4	V	32	7	8	NA	NA	NA	NA	NA						Discharged		NA
		G20	F	2.2	V	33	6	8	NA	NA	NA	NA	NA						Discharged		NA
		G21	F	1.9	V	33	7	8	NA	NA	NA	NA	NA						Discharged		NA
		G22	F	1.1	V	30	7	8	NA	NA	NA	NA	NA						Discharged		NA
		G23	M	1.7	V	32	7	8	NA	NA	NA	NA	NA						Discharged		NA
		G24	M	1.5	V	31	6	8	NA	NA	NA	NA	NA						Discharged		NA
		G25	M	1.7	V	32	6	7	NA	NA	NA	NA	NA						Discharged		NA
		G26	M	1.2	V	33	6	8	NA	NA	NA	NA	NA						Discharged		NA
		G27	F	1.3	V	31	8	9	NA	NA	NA	NA	NA						Discharged		NA
		G28	F	1.6	V	31	6	8	NA	NA	NA	NA	NA						Discharged		NA
		G29	F	1.8	V	34	8	8	NA	NA	NA	NA	NA						Discharged		NA
		G30	F	2.2	V	33	7	8	NA	NA	NA	NA	NA						LAMA		NA
		G31	M	1.5	V	33	7	8	NA	NA	NA	NA	NA						Discharged		NA
		G32	M	1.5	V	33	5	7	NA	NA	NA	NA	NA						Discharged		NA
		G33	F	1.6	V	32	7	8	NA	NA	NA	NA	NA						Discharged		NA
		G34	M	1.9	V	34	7	8	NA	NA	NA	NA	NA						Discharged		NA
		G35	M	1.6	V	34	7	8	NA	NA	NA	NA	NA						Discharged		NA
		G36	M	2.2	V	31	6	8	NA	NA	NA	NA	NA						Discharged		NA
		G37	M	1.9	V	31	6	8	NA	NA	NA	NA	NA						Discharged		NA
		G38	F	1.1	V	31	7	8	NA	NA	NA	NA	NA						Discharged		NA
		G39	F	1.7	V	34	6	7	NA	NA	NA	NA	NA						Discharged		NA
		G40	M	1.5	V	29	7	8	NA	NA	NA	NA	NA						Discharged		NA
		G41	M	1.6	V	32	7	8	NA	NA	NA	NA	NA						Discharged		NA
		G42	F	1.6	C	33	6	8	NA	NA	NA	NA	NA						Discharged		NA
		G43	F	1.1	C	32	7	8	NA	NA	NA	NA	NA						Discharged		NA
		G44	F	1.9	C	31	7	8	NA	NA	NA	NA	NA						Discharged		NA
		G45	M	1.5	C	32	6	7	NA	NA	NA	NA	NA						LAMA		NA
		G46	M	1.3	C	33	7	8	NA	NA	NA	NA	NA						LAMA		NA
		G47	F	1.8	C	34	5	6	NA	NA	NA	NA	NA						Discharged		NA
		G48	F	2.1	C	32	7	8	NA	NA	NA	NA	NA						Discharged		NA
		G49	M	2.3	C	32	6	7	NA	NA	NA	NA	NA						Discharged		NA
		G50	M	1.6	C	33	6	7	NA	NA	NA	NA	NA						Discharged		NA
		G51	F	1.7	C	34	6	7	NA	NA	NA	NA	NA						Discharged		NA
		G52	F	1.7	C	31	7	8	NA	NA	NA	NA	NA						Discharged		NA
		G53	F	1.7	C	33	7	8	NA	NA	NA	NA	NA						Discharged		NA
		G54	M	1.4	C	31	6	7	NA	NA	NA	NA	NA						Discharged		NA
		G55	M	1.9	C	33	6	7	NA	NA	NA	NA	NA						Discharged		NA
		G56	F	1.6	C	34	7	8	NA	NA	NA	NA	NA						Discharged		NA
		G57	F	1.4	C	30	6	7	NA	NA	NA	NA	NA						Discharged		NA
		G58	M	1.8	C	33	7	8	NA	NA	NA	NA	NA						Discharged		NA
		G59	F	1.6	C	31	7	8	NA	NA	NA	NA	NA						Discharged		NA
		G60	F	1.3	C	33	7	8	NA	NA	NA	NA	NA						Discharged		NA
		G61	M	1.8	C	33	9	9	NA	NA	NA	NA	NA						Discharged		NA
		G62	M	1.2	C	31	8	8	NA	NA	NA	NA	NA						Expired		NA
		G63	F	1.7	C	34	8	9	NA	NA	NA	NA	NA						Discharged		NA
		G64	F	2.2	C	34	9	9	NA	NA	NA	NA	NA						Discharged		NA
		G65	M	2.3	C	33	8	9	NA	NA	NA	NA	NA						Discharged		NA
		G66	M	1.7	C	33	4	9	NA	NA	NA	NA	NA						Discharged		NA
		G67	F	2.5	C	32	9	9	NA	NA	NA	NA	NA					diphtheroids	Discharged		NA
		G68	F	1.4	C	34	7	10	NA	NA	NA	NA	NA						Discharged		NA
		G69	M	1.5	C	31	8	9	NA	NA	NA	NA	NA						LAMA		NA
	No Sepsis	H1	F	1.5	C	33	7	8	N	N	N	N	N	LPV MORE THEN 11 DAYS	8300	5010	6		Discharged		N
		H2	M	1.9	C	33	8	9	N	N	N	N	N	LPV FOR 1 DAY	6200	2000			Discharged		N
		H3	M	2.1	V	33	7	8	Y	N	N	N	N	lpv 29 hrs	18600	1259			Discharged		N
		H4	F	2.1	V	34	1	7	Y	N	N	N	N	BPV x 4 HRS	26600	6150			Discharged		N
		H5	M	1.7	V	31	7	8	N	N	N	N	N	LPV x 5 DAYS	7900	1990			Discharged		N
		H6	F	1.3	V	33	5	7	Y	N	Y	N	N		11000	4380			Discharged		N
		H7	M	1.5	V	34	8	9	NA	NA	NA	NA	NA						Discharged		NA
		H8	M	1.8	V	33	8	9	N	N	N	N	N	LPV 8 DAYS	15500				Discharged		N
		H9	M	1	V	34	7	8	Y	N	N	N	N	LPV x 2 DAY	38200	1360			Discharged		N
		H10	F	1.1	V	29	8	9	N	N	N	N	N	BPV X 3 DAYS	12500	5630			Discharged		N
		H11	F	1.4	V	32	7	9	N	N	N	N	N	LPV 48 HRS	37900	2140			Discharged		N
		H12	M	1.7	V	33	6	8	N	N	Y	N	N		10700	4500			Discharged		N
		H13	M	1.5	V	32	6	8	Y	N	N	N	N	LPV 90 HRS	19400	9260			Discharged		N
		H14	F	1.2	V	29	7	8	Y	N	N	N	N	thyroid disorders	9900	5280			Admitted		Y	Amikacin, Cloxacillin	4, 4
		H15	M	1.2	V	33	6	9	N	N	N	N	N	mod anemia	17500	6480			Discharged		N
		H16	M	1.7	V	33	7	8	Y	N	N	N	N	prematurity lbw foul smelling stool	11200	6710			Discharged		N
		H17	F	2.6	V	32	8	9	Y	N	N	N	N	RH MOTHER	11100	2840			Discharged		N
		H18	F	1.8	V	33	7	8	N	N	N	N	N	pusmles presentonset whele ody since 8 4					LAMA		N
		H19	F	2.3	V	33	7	8	N	N	N	N	N	pusmles presentonset whele ody since 8 4					LAMA		Y	Amikacin, Cloxacillin	1, 1
		H20	M	1.6	V	32	8	9	Y	N	Y	N	N	regurgitation	8900	4760			Discharged		Y	Amikacin, Cloxacillin	6, 6
		H21	F	1.3	V	29	7	8	Y	Y	N	N	Y	LPV 1 DAYS	10300	3820			Discharged		N
		H22	F	1.2	V	30	5	7	N	N	N	N	Y	SHOCK	5600	2300			Expired	Birth Asphyxia	Y	Amikacin, Cloxacillin	1, 1
		H23	NA	1.8	V	34	8	9	N	N	N	N	N	LPV 24 HRS	9000	3810			Discharged		N
		H24	F	1.6	V	31	8	9	N	NA	Y	N	N						Discharged		N
		H25	F	1.4	V	30	5	7	Y	N	N	N	N						Expired	Prematurity	Y	Ampicillin, Gentamycin, Amikacin	4, 4, 1
		H26	M	1.6	V	32	7	8	Y	N	N	N	N		15000	4950			Discharged		Y	Ampicillin	5
		H27	M	1.5	V	32	7	8	Y	N	N	N	N		9700	4365	12		Discharged		Y	Ampicillin	5
		H28	M	0.9	V	31	3	4	Y	N	N	N	N	Neonatal Seizures	29900	6500			Expired	Others	Y	Ampicillin, Gentamycin	3, 3
		H29	M	1.1	V	30	6	8	Y	N	N	N	N		12100	2700			Expired	Congenital Malformations	Y	Ampicillin, Gentamycin	2, 2
		H30	F	2	V	34	6	7	N	N	N	N	N	PPROM Fever in mother 3days Chorioamnionitis	11400	8094			Discharged		Y	Ampicillin, Gentamycin	4, 4
		H31	M	2.5	V	32	5	7	Y	N	N	N	N		14000		230		Discharged		Y	Gentamycin, Ceftriaxone	5, 5
		H32	M	1.9	V	31	8	9	Y	N	Y	N	N	Maternal Hypothyroidism	10100		20		Discharged		Y	Gentamycin, Ceftriaxone	6, 6
		H33	M	1.2	V	34	4	6	Y	N	N	N	N		20900		7		Expired	Birth Asphyxia	N
		H34	M	2.1	C	32	7	8	Y	N	Y	N	N		10800		12		Discharged		N
		H35	M	1.7	C	31	9	10	Y	N	N	N	N	Twi days LPV History in Mother	5200		25		LAMA		N
		H36	M	1.7	C	33	9	10	Y	N	N	N	N						Discharged		Y	Ceftriaxone, Gentamycin	4, 4
		H37	F	1	C	28	8	8	Y	N	N	N	N		8100		2		Expired	Prematurity	Y	Ceftriaxone, Gentamycin	1, 1
		H38	F	2	C	34	9	9	Y	N	N	N	N	10 days LPV history in Mother	19600		15		Discharged		Y	Ceftriaxone, Gentamycin	5, 5
		H39	F	1.2	C	31	7	9	Y	N	Y	N	N		8000		6		Expired	Others	Y	Vancomycin, Ceftriaxone	1, 1
		H40	F	1.4	C	31	7	9	Y	N	N	N	N		9200		2		Expired	Others	Y	Meropenem, Vancomycin	1, 1
		H41	F	1.6	C	33	9	9	Y	N	N	N	N	3 Days LPV History in Mother	11000		10		Discharged		N
		H42	M	2.2	C	32	9	9	N	N	N	N	N	Mother history of CPV PPROM	23300		57		Discharged		N
		H43	M	2.1	C	33	9	10	Y	N	N	N	N		11800		12		Discharged		Y	Ceftriaxone, Gentamycin	4, 4
		H44	F	2	C	33	9	9	Y	N	N	N	N						Discharged		N
		H45	M	1.7	C	32	8	8	Y	N	N	N	N	Melena	8200		2		Discharged		N
		H46	M	1.5	C	31	9	9	Y	N	N	N	N		13290				LAMA		Y	Gentamycin, Ceftriaxone	1, 1
		H47	F	1.4	C	31	7	8	Y	N	N	N	N		3100				LAMA		Y	Gentamycin, Ceftriaxone	1, 1
		H48	M	1.6	C	30	9	9	Y	N	N	N	N		12000		27		Discharged		Y	Ceftriaxone, Gentamycin	8, 8
		H49	F	1.8	C	32	3	6	Y	N	N	N	N	Maternal History of LPV since 3 days					Expired	Birth Asphyxia	Y	Ceftriaxone, Gentamycin	1, 1
		H50	F	1.7	C	34	9	9	Y	N	N	N	N	70hr of LPV and BPV history in Mother	10900		16		Discharged		N
		H51	M	1.9	C	32	1	4	Y	N	N	N	N	2 hour of LPV history in Mother					Expired	Others	Y	Ceftriaxone, Gentamycin	1, 1
		H52	F	1.3	C	31	8	8	Y	N	N	N	N	LPV 28 hour history in Mother	8970	5310			Expired	Prematurity	Y	Meropenem, Vancomycin	8, 8
		H53	M	1.7	C	31	9	9	Y	N	N	N	N	Maternal history of LPV since 25 days	7600		16		Expired	Infection	Y	Gentamycin, Meropenem, Linezolid	3, 6, 3
		H54	M	1	C	30	8	8	Y	N	N	N	N		5700		44		Expired	Prematurity	Y	Meropenem, Gentamycin, Ceftriaxone	1, 2, 3
		H55	M	1.9	C	32	6	10	Y	N	N	N	N		2400		5		Expired	Infection	Y	Meropenem, Vancomycin	1, 1
		H56	M	0.9	C	28	7	7	Y	N	N	N	N		5100		10		Expired	Prematurity	Y	Ceftriaxone, Amoxiclav	1, 1
		H57	M	1.7	C	30	8	9	N	N	N	N	N		12400				Discharged		Y	Ceftriaxone, Gentamycin, Amoxiclav	6, 6, 3
		H58	F	1.4	C	32	1	5	Y	Y	N	N	N		10200		36		Discharged		N
		H59	F	1.8	C	32	7	9	Y	N	N	N	N	3 days of LPV and BPV history in mother and foul smell in liquor	6100		17		Discharged		Y	Gentamycin, Ceftriaxone	3, 3
		H60	F	2.2	C	33	9	10	Y	N	N	N	N		16500	1304	3		Discharged		Y	Ceftriaxone, Gentamycin, Meropenem	1, 5, 4
		H61	M	1.7	C	32	9	9	Y	N	N	N	N		11900				Discharged		Y	Ceftriaxone, Gentamycin	6, 6
		H62	M	1.1	C	32	2	5	Y	N	N	N	N	Maternal history of BPV since 12hrs	17800				Expired	Birth Asphyxia	Y	Meropenem, Gentamycin	1, 1
		H63	M	2	C	31	9	9	Y	N	N	N	Y	Maternal history of LPV since 3days	11900		12		Discharged		N
		H64	M	1.3	C	29	7	8	Y	Y	NA	NA	Y	LVP 44 HOURS	58000	2910	6		Discharged		Y	Amikacin, Cloxacillin	7, 7
		H65	M	1	C	29	7	8	Y	N	N	N	N		56		2		Expired	Infection	Y	Ceftriaxone, Gentamycin, Meropenem, Vancomycin	1, 1, 4, 4
		H66	F	1.2	C	31	7	9	Y	N	Y	N	N		7700		42		Expired	Others	Y	Gentamycin, Ceftriaxone, Meropenem	1, 1, 1
		H67	M	1.3	V	31	7	8	Y	N	N	N	Y	LPV DAYS	17000	1800			Discharged		Y	Amikacin, Cloxacillin	7, 7
		H68	M	1	V	28	5	6	Y	N	Y	N	N		22700	68700			Expired	Infection	Y	Ampicillin, Gentamycin, Amikacin, Piperacillin+tezobactam, Fluconazole	2, 2, 10, 10, 1
Validation set	Culture Negative	H1	F	1.125	C	34	7	8	Y	N	N	N	N	SHOCK hypothyroidism	13200	3680			Expired	Prematurity	Y	Amikacin, Cloxacillin	3
		H2	M	1	V	30	8	9	Y	N	Y	N	N	LPV 8 prematurity	13800	5500			Expired	Prematurity	Y	Amikacin, Cloxacillin, Vancomycin	9, 4, 5
		H3	F	1.655	V	31	7	8	Y	Y	N	N	N	LPV SINCE SHOCK HMD	14400	8180			Expired	Prematurity	Y	Amikacin, Cloxacillin, Vancomycin, Meropenem, Netilmicin	4, 4, 4, 4, 1
		H4	F	1.16	V	34	1	7	Y	Y	N	N	N		18300	2100			Expired	Infection	Y	Ampoxiclav, Cloxacillin	1, 2
		H5	M	1.45	V	31	7	9	NA	NA	NA	NA	NA						Expired		NA
		H6	F	1.125	C	31	4	7	NA	NA	NA	NA	NA						Expired		NA
		H7	M	0.962	V	29	5	7	Y	N	Y	N	Y	LPV 2 DYAS	2800	950			Admitted		Y	Amikacin, Cloxacillin, Vancomycin, Meropenem	9, 9, 18, 13, 5
		H8	M	0.99	V	28	8	9	NA	NA	NA	NA	NA						Expired		NA
		H9	M	1.99	V	33	6	7	Y	N	Y	N	N		13600	8300	12		LAMA		Y	Ampicillin, Gentamycin	11
		H10	M	0.96	V	29	2	5	Y	N	Y	N	N		35900	1200			Expired	Prematurity	Y	Ampicillin, Gentamycin, Amikacin, Peperacillin, Tazobactam	2, 2, 1, 1
		H11	F	1.34	V	29	5	7	Y	N	N	N	N		13700	5100	6		Expired	Infection	Y	Ampicillin, Gentamycin, Amikacin, Piperacillin, Tazobactam, Metronidazole	3, 3, 6,6, 1, 1
		H12	M	1.27	V	30	7	8	Y	N	N	N	N	Mat history PPROM	52100	38600			Discharged		Y	Ampicillin, Gentamycin	14
		H13	M	1.74	V	31	7	8	Y	N	N	N	N		18500	12117			LAMA		Y	Amikacin, Piperacillin, Tazobactam, Vancomycin	1, 7, 7
		H14	F	1.02	V	28	7	8	Y	Y	N	N	N		11200	5400	6		Admitted		Y	Ampicillin, Gentamycin, Amikacin, Piperacillin, Tazobactam, Amikacin, Poperacillin, Tazobactam, Metronidazole	7, 7, 7, 7, 1, 1, 1
		H15	F	1.63	V	30	7	8	Y	N	N	N	N		10800	4000	6		Discharged		Y	Ampicillin, Gentamycin, Amikacin, Piperacillin, Tazobactam	4, 4, 9, 9
	Culture Positive	I1	F	0.6	V	28	4	5	Y	N	N	N	Y		8000	930	6	CNS	Expired	Prematurity	Y	Amikacin, Cloxacillin	1
		I2	M	1.53	C	32	7	8	Y	N	N	N	Y		2900	1300		EC	Discharged		Y	Amikacin, Cloxacillin, Meropenem	26
		I3	F	1.59	V	33	6	7	Y	N	N	N	N	LPV 5 HRS	2400	310		AB	Expired	Infection	Y	Amikacin, Amoxiclav	1
		I4	F	1.64	V	31	7	8	Y	N	N	N	Y	LPV 18 HRS prematurity wreight anc falliny	11500	7300		Mixed	Discharged		Y	Amikacin, Cloxacillin, Netilmicin, Vancomycin	12, 9, 10, 9
		I5	F	0.98	C	29	6	8	Y	N	N	N	N	LPV 4 DAYS PERINATAL ASPHYXIA RFS	15700	6300		KP	Admitted		Y	Amikacin, Cloxacillin, Colistin, Vancomycin	13, 13, 8, 3
		I6	M	1.4	V	31	7	9	NA	NA	NA	NA	NA					Mixed	Discharged		NA
		I7	M	1.28	V	28	7	8	NA	NA	NA	NA	NA					AB	Discharged		NA
		I8	M	1.2	C	28	5	6	Y	N	N	N	Y		11800	6500		EC	Expired	Infection	Y	Ampicillin, Gentamycin, Amikacin, Piperacillin, Tazobactam, Colistin	7, 7, 7, 7, 10
		I9	M	1.97	V	32	7	8	Y	N	Y	N	N					AB	Expired	Infection	Y	Ampicillin, Gentamycin	4
		I10	F	2.2	C	33	7	8	Y	N	N	N	N	Shock.	18600	2418	48	AB	Expired	Infection	Y	Ampicillin, Gentamycin , Amikacin, Colistin	3, 3, 8, 8
		I11	F	1	C	29	6	7	Y	N	Y	N	N		13500	4100		SA	Expired	Infection	Y	Ampicillin, Gentamycin	9
		I12	M	1.9	C	34	6	7	Y	Y	N	N	Y	Weak peripheral pulses neonatal seizures septic look	4700	3800		SM	Expired	Infection	Y	Amikacin, Piperacillin, Tazobactam, Colistin	1
		I13	F	1.74	V	32	7	8	Y	N	N	N	N		7000	2600		AB	Expired	Infection	Y	Ampicillin, Gentamycin	2
		I14	F	1.58	V	32	6	8	Y	N	N	N	N		9400	3900		EF	Expired	Infection	Y	Ampicillin, Gentamycin	2
		I15	F	1.79	V	32	6	7	Y	N	N	N	N	Mat history of PPROM	15300	4300	6	AB	LAMA		Y	Ampicillin, Gentamycin, Amikacin, Piperacillin, Tazobactam	5, 5, 1, 1
	Healthy Control	J1	F	1.4	V	34	6	7	NA	NA	NA	NA	NA						Discharged		NA
		J2	M	1.82	V	33	7	8	NA	NA	NA	NA	NA						Discharged		NA
		J3	M	1.9	V	34	6	7	NA	NA	NA	NA	NA						Discharged		NA
		J4	M	1.53	V	30	6	7	NA	NA	NA	NA	NA						LAMA		NA
		J5	M	2.12	V	33	7	8	NA	NA	NA	NA	NA						Discharged		NA
		J6	M	1.98	V	33	6	7	NA	NA	NA	NA	NA						Discharged		NA
		J7	F	1.55	V	34	7	8	NA	NA	NA	NA	NA						Discharged		NA
		J8	M	1.35	V	33	7	8	NA	NA	NA	NA	NA						Discharged		NA
		J9	M	1.65	V	32	7	8	NA	NA	NA	NA	NA						Discharged		NA
		J10	M	1.57	V	32	6	8	NA	NA	NA	NA	NA						Discharged		NA
		J11	M	1.7	C	30	7	8	NA	NA	NA	NA	NA						Discharged		NA
		J12	M	1.15	C	33	3	7	NA	NA	NA	NA	NA						Discharged		NA
		J13	F	1.5	C	33	5	8	NA	NA	NA	NA	NA						Discharged		NA
		J14	M	1.7	C	32	7	8	NA	NA	NA	NA	NA						Discharged		NA
		J15	M	1.82	V	33	7	7	NA	NA	NA	NA	NA						Discharged		NA
	No Sepsis	K1	M	2.3	V	33	6	7	N	N	Y	N	N		15000	9400			Discharge		N
		K2	M	2.27	V	33	8	9	N	N	N	N	N	LPU 12 HRS LBW	17300	6950			LAMA		N
		K3	M	1.51	V	31	8	9	Y	N	N	N	N	lpv 6 hrs hemolytic anemia early onset hypothyroidism conjunction hyperbilirubinmia	25600	9590			Discharged		Y	Amikacin, Cloxacillin	4
		K4	M	2.145	C	34	8	9	N	N	N	N	N	congenital heart disease	10800	3490			Discharged		N
		K5	F	1.523	V	32	7	8	N	N	N	N	N	LPV 6 HRS WT LOSSBLOCK SPOT ON LEG	12200	4610			Discharged		Y	Amikacin, Cloxacillin	1
		K6	F	2.2	C	33	2	5	Y	N	N	N	N	RD GENTAL WHITE DISCHARGE	11000	4780			Expired	Birth asphyxia	Y	Amikacin, Cloxacillin, Ciprofloxacin, Netilmicin	2, 2, 1, 1
		K7	M	1.16	V	34	7	9	N	Y	Y	N	N	BLOOD STOOL BPU 5 DAYS	9900	3730			Discharged		N
		K8	M	1.57	V	33	8	9	N	N	N	N	Y	MILD SCR	10900	6220			Discharged		N
		K9	M	0.7	C	29	6	6	Y	N	N	N	Y	Baby on UVC , Bag & Mask Ventilation , Peripheries.					Expired	Prematurity	N
		K10	M	1.7	C	33	7	8	Y	N	N	N	N		5300	900			Discharged		Y	Ampicillin, Gentamycin	6
		K11	F	1.7	V	32	6	7	Y	N	N	N	N		15600	9500			Discharged		Y	Ampicillin, Gentamycin	4
		K12	F	1.2	V	30	7	8	Y	N	N	N	N		11300	3200			Expired	IVH, intracranial bleed	Y	Amipicillin, Gentamycin, Piperacillin, Tezobactam, Amikacin	2
		K13	M	1.2	V	32	7	8	Y	N	N	N	N	Mat History of leaking	4900	2700			LAMA		Y	Ampicillin, Gentamycin	5
		K14	F	2.26	V	34	7	8	Y	N	N	N	N		24200	14500	6		Discharged		Y	Ampicillin	3
		K15	M	2.25	C	32	4	7	Y	N	N	N	N		14300	2700	6		LAMA		Y	Ampicillin	4
Follow-up set	Culture Negative	L1	F	1.65	V	33	8	9	N	N	N	N	N	PROM WITH LPV	10600	3550			Discharged		Y	Cloxacillin	6
		L2	M	1.22	V	28	7	8	Y	N	N	N	N		16900	8800			Admitted		Y	Ampicillin, Gentamycin, Amikacin, Piperacillin +tazobactam	6, 6, 7, 7
		L3	M	1.27	V	30	3	3	Y	N	N	N	N		6300	2600	24		Admitted		Y	Ampicillin, Gentamycin, Amikacin, Colistin	3, 8, 14, 10
		L4	M	1.17	V	31	3	6	Y	N	N	N	N		9300	24000			Admitted		Y	Ampicillin, Fluconazole,Amphotericin	7, 1, 14
		L5	M	0.95	C	28	2	7	Y	N	N	N	N	LPV 3 DAYS PREMAKINTY FM ABSENT 3 4 DAYS	6300	3500			Admitted		Y	Amikacin, Cloxacillin, Netilmycin, Vancomycin	3
		L6	M	1.4	C	34	9	9	Y	N	N	N	N	APH History in Mother	7600		42		Admitted		Y	Ceftriaxone,Gentamycin, Meropenem, Vancomycin, Metronidazole, Colistin, Fluconazole	4, 4, 1, 14, 1, 10, 6
		L7	M	1.44	V	30	6	7	Y	N	N	N	N	LPV 77 HRS	860	5100			Discharged		Y	Amikacin, Cloxacillin	5
		L8	M	1.48	V	28	6	8	Y	N	N	N	N		7700	1600			Discharged		Y	Cefotaxime, Amikacin	8
		L9	M	1.77	V	32	5	6	Y	N	N	N	N		20400	12500	6		Discharged		Y	Ampicillin, Gentamycin, Amikacin, Piperacillin +tazobactam	4
		L10	M	1.8	V	32	4	6	Y	N	N	N	N		46720	6230			Discharged		Y	Ampicillin, Gentamycin	6
		L11	M	1.47	V	31	4	6	Y	N	N	N	N		12200	4758	6		Discharged		Y	Ampicillin	11
		L12	F	1.52	V	31	7	8	Y	N	N	N	N		23500	7600	6		Discharged		Y	Ampicillin, Gentamycin	7
		L13	F	1.79	V	30	6	7	Y	N	N	N	N		12500	7600			Discharged		Y	Ampicillin, Gentamycin	7
		L14	F	1.4	V	32	9	9	Y	N	N	N	N	24 hour of LPV history	2400				Discharged		Y	Colistin, Vancomycin,Metronidazole, Meropenem	11, 14, 8, 4
		L15	F	1.3	V	31	9	9	Y	N	N	N	N	4 days of LPV history in Mother	6200		9		Discharged		Y	Gentamycin, Ceftriaxone, Meropenem, Vancomycin	1, 1, 7, 7
		L16	F	1.5	V	33	9	9	Y	N	N	N	N	LPV 4 days history in Mother	13900		48		Discharged		Y	Ceftriaxone, Gentamycin	7
		L17	M	2.5	C	34	6	8	Y	N	N	N	N		13000	5000	12		Discharged		Y	Ampicillin, Gentamycin, Amikacin, Piperacillin +tazobactam	4, 4, 8, 8
		L18	M	1.4	C	30	4	6	Y	N	N	N	N	Mother - Placenta Previa.	13300	5200	6		Discharged		Y	Ampicillin, Gentamycin	6
		L19	M	1.2	C	29	7	8	Y	N	N	N	N		9300	6789			Discharged		Y	Ampicillin, Gentamycin	10
		L20	M	1.5	C	30	6	8	Y	N	N	N	N		36300	31300			Discharged		Y	Ampicillin, Gentamycin, Amikacin, Piperacillin +tazobactam	1, 1, 6, 6
		L21	M	2.2	C	34	5	7	Y	N	N	N	N		5200	4300	6		Discharged		Y	Ampicillin,Amikacin, Piperacillin +tazobactam, Colistin	3, 8, 15, 8
		L22	F	1.6	C	31	6	7	Y	N	N	N	N		32000	1660			Discharged		Y	Piperacillin +tazobactam, Amikacin	10
		L23	F	1.3	C	33	6	8	Y	N	N	N	N	Maternal History of PPROM	40100	27268	6		Discharged		Y	Ampicillin	7
		L24	M	1.52	C	30	8	9	Y	N	N	N	N	SPOTTING	9400	5440			Discharged		Y	Amikacin, Cloxacillin	1
		L25	F	1.6	V	33	9	9	Y	N	N	N	N		9300				Referred		Y	Gentamycin, Ceftriaxone	11
		L26	M	1.25	C	30	6	8	Y	N	N	N	N		9900	1700			Discharged		Y	Ampicillin,Gentamycin, Piperacillin +tazobactam, Amikacin	5, 5, 12, 12
		L27	M	0.99	V	30	7	7	Y	Y	N	N	N		5600	1800	12		Admitted		Y	Ampicillin,Gentamycin,Amikacin, Piperacillin +tazobactam	3, 3, 14, 14
		L28	F	1.56	C	32	6	8	N	N	Y	N	N	LPV 17 HRS HMD FEED NOT LERANCE	4500	1250			Discharged		Y	Amikacin, Cloxacillin, Vancomycin,Meropenem	2, 2, 13, 12
		L29	F	1.4	C	33	7	8	N	N	Y	N	N	Altered greenish aspirate since morning	9800	2500	6		Discharged		Y	Ampicillin,Gentamycin, Metronidazole	5
		L30	M	1.4	V	29	6	8	N	N	Y	N	N	FEED INTOERANCE SHOCK BPV 12 HRS	2800	1160			Discharged		Y	Amikacin, Cloxacillin	3
		L31	M	1.89	C	31	8	9	Y	N	Y	N	N	LPV 90 HRS REND PYELACTASIS	11300	4130			Discharged		Y	Amikacin, Cloxacillin, Vancomycin, Meropenem, Netilmycin	4, 4, 18, 1, 17
		L32	F	1.1	C	34	7	8	Y	N	Y	N	N		10700	5500	6		Discharged		Y	Amikacin, Piperacillin +tazobactam, Linezolid	7, 7, 5
		L33	F	1.15	C	31	7	8	Y	N	Y	N	N		8300	3652			Discharged		Y	Ampicillin, Gentamycin	10
		L34	M	1.65	C	31	6	7	Y	N	N	Y	N	Seizures	30000	11900			Discharged		Y	Ampicillin	10
		L35	F	1.4	C	33	6	6	Y	N	N	Y	N	Maternal History of PPROM	9700	5900			Discharged		Y	Ampicillin	7
	Culture Positive	M1	M	1.7	C	33	8	9	N	N	N	N	N	LPV 120 HRS	8400	3050		KP	Discharged		Y	Amikacin,Cloxacillin, Piperacillin +tazobactam, Colistin	7, 7, 2, 17
		M2	M	1.26	V	29	5	6	Y	N	N	N	N		14700	8400		CK	Admitted		Y	Ampicillin	7
		M3	M	2	V	31	8	8	Y	N	N	N	N	18 hrs history of LPV in mother	8100		21		Admitted		Y	Gentamycin, Ceftriaxone	10
		M4	F	1.614	V	31	7	8	Y	N	N	N	N	18 hrs of LPV history in Mother	6100		139	CR	Admitted		Y	Gentamycin, Ceftriaxone, Meropenem, Vancomycin, Colistin, Fluconazole	7, 7, 21, 14, 16, 14
		M5	M	1.05	C	29	6	7	Y	N	N	N	N		6100	2400	6	SHo, AB	Admitted		Y	Ampicillin, 8, Amikacin,Piperacillin +tazobactam, Metronidazole, Colistin, Fluconazole, 31, 18	4, 4, 2, 15, 5, 10, 10, 9, 10
		M6	F	1.25	C	33	8	9	Y	N	N	N	N		12100			CN	Admitted		Y	Ceftriaxone, Gentamycin, Meropenem, Vancomycin, Colistin	1, 1, 1, 20, 20
		M7	F	1.25	V	29	7	9	Y	N	N	N	N		8000		2	SE	Discharged		Y	Meropenem, Gentamycin	15
		M8	F	2.3	V	34	9	9	Y	N	N	N	N	More than 72 hrs maternal history of LPV	49600		168	KP	Discharged		Y	Gentamycin, Metronidazole, Meropenem	5, 6, 11
		M9	F	2	V	31	7	9	Y	N	N	N	N	Maternal history of LPV since 9 hours	8500			KP, CR	Discharged		Y	Ceftriaxone,Gentamycin, Vancomycin, Meropenem,Colistin	2, 2, 11, 11, 10
		M10	M	1.5	C	33	9	10	Y	N	N	N	N	respiratory distress asphyxia	8200	4270		EC	Discharged		Y	Amikacin, Cloxacillin	15
		M11	M	1.7	C	34	7	8	Y	N	N	N	N		23000	1000		SM	Discharged		Y	Amikacin, Piperacillin +tazobactam, Colistin	14
		M12	M	1.8	C	34	9	9	Y	N	N	N	N		3500		57	EC, CG	Discharged		Y	Gentamycin, Meropenem,Colistin, Vancomycin, Metronidazole	2, 3, 15, 16, 1
		M13	F	1.35	C	34	7	8	Y	N	N	N	N		8700	3700	6	SH	Discharged		Y	Amikacin,Piperacillin +tazobactam, Linezolid	7, 7, 14
		M14	F	1.5	C	34	9	9	Y	N	N	N	N		1700		15	ES	Discharged		Y	Gentamycin, Ceftriaxone,Meropenem, Vancomycin	18, 18, 1, 1
		M15	F	1.912	C	32	9	9	Y	N	N	N	N	Mat history of LPV since 2hrs	13600			KP	Discharged		Y	Gentamycin, Ceftriaxone	18
		M16	M	1.3	C	31	4	5	Y	N	N	N	N	Perinatal asphyxia	16000	3100	6	AB	Referred		Y	Ampicillin, Gentamycin, Piperacillin +tazobactam, Colistin, Ceftazidime, Metronidazole	5, 5, 3, 6, 4, 2
		M17	M	1.7	V	34	8	9	Y	Y	N	N	N	RD ANEMIA	15900	6590		EC	Discharged		Y	Amikacin, Cloxacillin, Ciprofloxacin/norflox	4, 4, 19
		M18	F	1.1	C	30	7	8	Y	Y	N	N	N	BLOOD aspiration pneumonia	21300	9770		EC	Discharged		Y	Amikacin, Cloxacillin, Meropenem, Vancomycin, Colistin	2, 2, 8, 8, 20
		M19	F	1.31	V	31	6	7	N	N	Y	N	N	Vomiting , MRSA - Methicillin-resistant Staphylococcus aureus .	14700	5200	6	SA (MRSA)	Discharged		Y	Piperacillin +tazobactam, Amikacin, Vancomycin	3, 3, 10
		M20	M	0.96	V	28	7	8	Y	N	Y	N	N		6400	1300	12	SH	Admitted		Y	Ampicillin, Gentamycin, Vancomycin	14
		M21	M	1.8	V	29	9	9	Y	N	Y	N	N		10100		28	AB	Admitted		Y	30,Gentamycin, Vancomycin,Colistin, Metronidazole, Meropenem, 33	5, 5, 3, 14, 4, 4, 15
		M22	M	1.39	V	30	6	7	Y	N	Y	N	N		17400	3800		SA	Discharged		Y	Piperacillin +tazobactam, Amikacin	9
		M23	M	1.76	V	32	7	8	N	Y	Y	N	N	Vomiting	13900	5800		SM	Discharged		Y	Ampicillin,Gentamycin, Amikacin, Piperacillin +tazobactam, Colistin, 24	2, 8, 14, 8, 5, 10
		M24	F	1.09	V	28	8	9	Y	N	N	N	Y	LPV 5 DAYS RFS PLUS	4100	980		EF	Admitted		Y	Amikacin, Cloxacillin, Piperacillin +tazobactam, Vancomycin	6, 6, 6, 15
		M25	F	1.14	V	28	7	8	Y	Y	N	N	Y	BPV 2 DAYS RFS	9100	4430		ASB	Admitted		Y	Amikacin, Cloxacillin, Vancomycin, Piperacillin +tazobactam	10, 10, 7, 7
		M26	M	1.37	V	31	7	8	Y	Y	N	N	Y	LPV x 5 DAYS , RFS PLUS , CoNS PNEUMONIA	10500	2300		KP	Discharged		Y	Amikacin, Cloxacillin, Piperacillin +tazobactam, Vancomycin, Colistin	17, 3, 8, 2, 14
		M27	M	0.95	C	32	6	8	N	N	Y	N	Y	SHOCK	2960	250		SM	Admitted		Y	Amikacin, Piperacillin +tazobactam, Meropenem	21, 1, 21
		M28	F	1.37	C	32	8	9	Y	N	Y	N	Y	CPV 5 HRS HMD LOW ANC FEED SHOCK	1600	600		KP	Discharged		Y	Amikacin, Cloxacillin, Vancomycin, Meropenem	2, 2, 2, 20
		M29	F	1.186	C	29	6	8	Y	Y	Y	N	Y	BPV 38 HRS RFS TACHYPNEA	7000	550		AB	Discharged		Y	Amikacin, Cloxacillin	9
	No Sepsis	N1	F	1.7	V	32	7	8	N	N	N	N	N	LPV 14 HRS	17800	1003			Discharged		N
		N2	F	2.5	C	34	9	10	N	N	N	N	N		8600				Discharged		Y	Ceftriaxone, 8, Metronidazole, Meropenem	1, 1, 7, 7
		N3	M	1.13	V	29	7	8	N	N	N	N	N	M/H/O PPROM and Environmental sepsis					Discharged		Y	Ampicillin, Gentamycin	4
		N4	M	1.1	V	31	6	7	Y	N	N	N	N	maternal uti very premature	25900	5950			Admitted		Y	Amikacin, Cloxacillin	21
		N5	M	1.87	V	33	7	8	Y	N	N	N	N	Maternal History of Leaking Per Vaginal	10000	4700			Discharged		Y	Ampicillin, Gentamycin	1
		N6	M	1.74	V	32	6	7	Y	N	N	N	N		13700	7500			Discharged		Y	Ampicillin	5
		N7	M	1.75	V	33	8	9	Y	N	N	N	N		19400		22		Discharged		N
		N8	M	2	V	32	9	9	Y	N	N	N	N		10800		16		Discharged		N
		N9	F	1.7	V	33	8	9	Y	N	N	N	N	RD					Discharged		N
		N10	F	1.6	V	33	6	7	Y	N	N	N	N		13900	8900	6		Discharged		Y	Ampicillin, Gentamycin	4
		N11	F	1.93	V	30	7	8	Y	N	N	N	N		8100	3300	6		Discharged		Y	Amikacin, Piperacillin +tazobactam	5
		N12	F	1.4	V	30	9	10	Y	N	N	N	N	History Of LPV since 3 days History of BPV since 2 weeks	16500		2		Discharged		Y	Ceftriaxone, Gentamycin	5
		N13	M	2.025	C	31	7	8	Y	N	N	N	N	WBC Low.	8100	1300	6		Discharged		Y	Ampicillin, Gentamycin	5
		N14	M	1.25	C	32	6	6	Y	N	N	N	N		10200	3060			Discharged		Y	Ampicillin, Gentamycin	3
		N15	M	1.25	C	29	5	6	Y	N	N	N	N	Mother PPROM	9000	3900			Discharged		Y	Ampicillin, Gentamycin	7
		N16	M	2.25	C	33	7	9	Y	N	N	N	N		11400		28		Discharged		N
		N17	M	1.8	C	32	5	9	Y	N	N	N	N	Maternal history of BPV 15 days	12800		25		Discharged		N
		N18	F	1.75	C	33	6	7	Y	N	N	N	N		15600	4836			Discharged		Y	Ampicillin, Gentamycin	4
		N19	F	1.75	C	32	6	7	Y	N	N	N	N		13400	6900			Discharged		Y	Ampicillin	5
		N20	F	2.2	C	34	7	8	Y	N	N	N	N		16200	10206			Discharged		Y	Ampicillin, Gentamycin, Amikacin, Piperacillin +tazobactam, Fluconazole, Amphotericin	9, 9, 7, 7, 2, 14
		N21	F	1.75	C	34	5	7	Y	N	N	N	N						Discharged		N
		N22	M	1	V	31	5	6	Y	N	N	N	N		24000		1		Discharged		Y	Ceftriaxone, Gentamycin	2
		N23	M	1.4	V	31	8	9	N	Y	N	N	N	LPV 1 DAYS	15200	6500			Discharged		N
		N24	F	1.4	V	32	1	5	Y	Y	N	N	N		10200		36		Discharged		N
		N25	F	1.5	C	34	3	6	Y	Y	N	N	N						Discharged		N
		N26	M	1.88	V	32	7	8	N	N	Y	N	N	Vomiting	18700	4000			Discharged		Y	Ampicillin	5
		N27	F	1.54	V	34	6	7	N	N	Y	N	N	Vomiting	17000	12500			Discharged		Y	Ampicillin, Gentamycin	5
		N28	M	2.04	V	34	6	7	Y	N	Y	N	N		11100	6100			Discharged		Y	Cefotaxime	8
		N29	F	1.455	V	31	7	8	Y	N	Y	N	N	LPV 12 HRS	13300	8300			Discharged		Y	Amikacin, Cloxacillin	7
		N30	M	1.135	V	28	6	8	Y	N	N	N	Y	RD	8500	5100			Discharged		N
		N31	F	1.54	V	31	5	8	Y	N	N	N	Y	LPV 1 DAYS	9600	4730			Discharged		Y	Amikacin, Cloxacillin	6
		N32	M	1	C	33	5	7	Y	N	N	N	Y	LPV x 3 DAYS , SCR PLUS	29900	3800			Discharged		Y	Amikacin, Cloxacillin	5
		N33	F	1.1	V	30	8	9	Y	Y	N	N	Y	congenital pneumonia lpv 12 days	15500	8580			Discharged		N
		N34	F	1.2	C	33	7	8	N	N	Y	N	Y		15000	5600			Discharged		Y	Ampicillin, Gentamycin	6
		N35	F	2.15	V	33	7	8	Y	N	Y	N	Y	LPV 3 DAYS FM 1 DAYS FLUID RESPAONSIVE SHOCK CONYENITAL PNEUMANIA HIR	26700	4930			Discharged		Y	Amikacin, Ciprofloxacin/norflox	7
		N36	M	1.65	C	34	5	8	NA	NA	NA	NA	NA						Discharged		N
*F/M:Female/Male #C/V:Cesarean/Vaginal aLPV: Leaky per vagina bAB: Acinetobacter baumannii EC: Escherichia coli SA: Streptococcus aureus SAG: Streptococcus agalacticae EF: Escherichia faecalis CNS: Coagulase negative Staphylococci SH: Staphylococcus haemolyticus SM: Serratia mercescens KP: Klebsiella pneumoniae PA: Pseudomonas aeruginossa SE: Staphylococcus epidermidis EFa: Enterococcus faecium C…
KP: Klebsiella pneumoniae
